# Supplementary material
Source: PubMed Central journal article supplement (PMC4130357)
Supplement: NIHMS610894-supplement-1.pdf [file NIHMS610894-supplement-1.pdf]

SUPPLEMENTARY INFORMATION

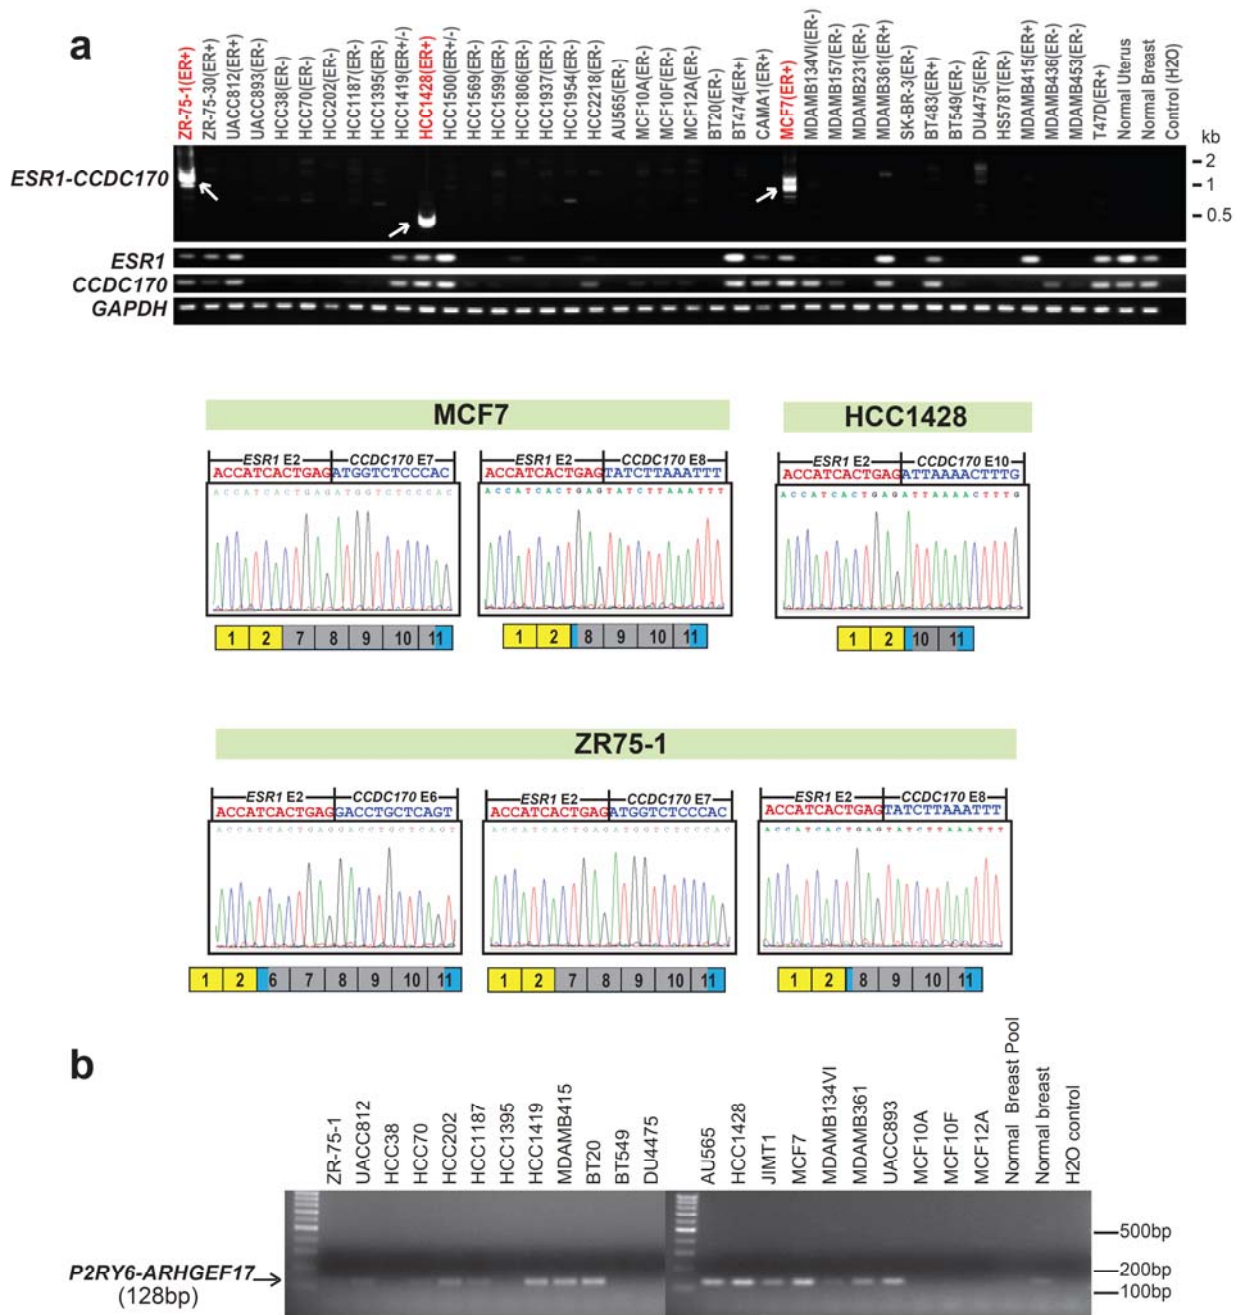

**Supplementary Figure 1. Detecting *ESR1-CCDC170* and *P2RY6-ARHGEF17* chimerical transcripts in breast cancer cell lines by RT-PCR.** (a) RT-PCR results using a forward primer (AACAGGCTCGAAAGGTCCATGC) in the first exon of *ESR1* and a reverse primer (GCCTAGCATCTGCGACACCACC) in the last exon of *CCDC170* (upper), and representative chromatograms of the fusion junction of each *ESR1-CCDC170* variant (lower). RT-PCR analysis of wt*ESR1* and wt*CCDC170* was performed using a forward primer from the second exon and a reverse primer from the third exon of the respective genes. The exon numbers are based on reference sequence NM\_001122742 for *ESR1*, NM\_025059 for *CCDC170*. (b) RT-PCR validation of the *P2RY6-ARHGEF17* fusion in a panel of breast cell lines and normal breast controls. The expected size of the *P2RY6-ARHGEF17* PCR product is 128bp.

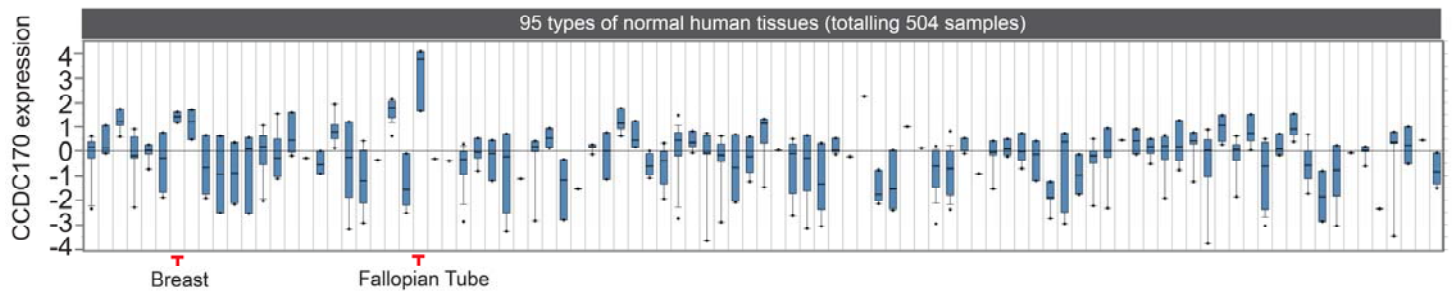

**Supplementary Figure 2. The expression of wild-type *CCDC170* in 95 types of normal human tissues.** Affymetrix U133 plus 2.0 gene expression data for normal human tissues are from the Human Body Index dataset (GSE7307) and are analyzed using OncoPrint (www.oncoPrint.org).

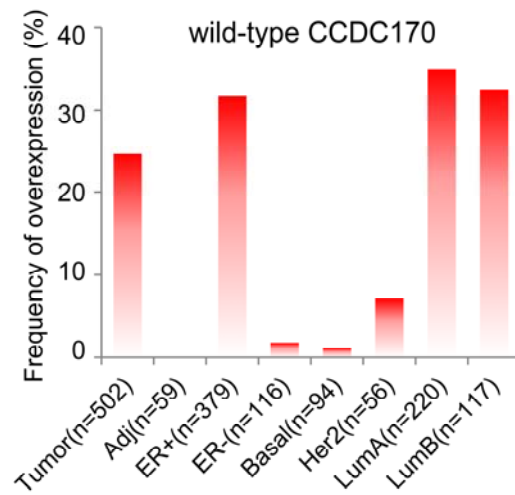

**Supplementary Figure 3. The frequency of wild-type *CCDC170* overexpression in different breast cancer subtypes.** Overexpression of wild-type *CCDC170* is almost exclusive to ER+ breast tumors with no significant difference observed between the luminal A and B tumors.

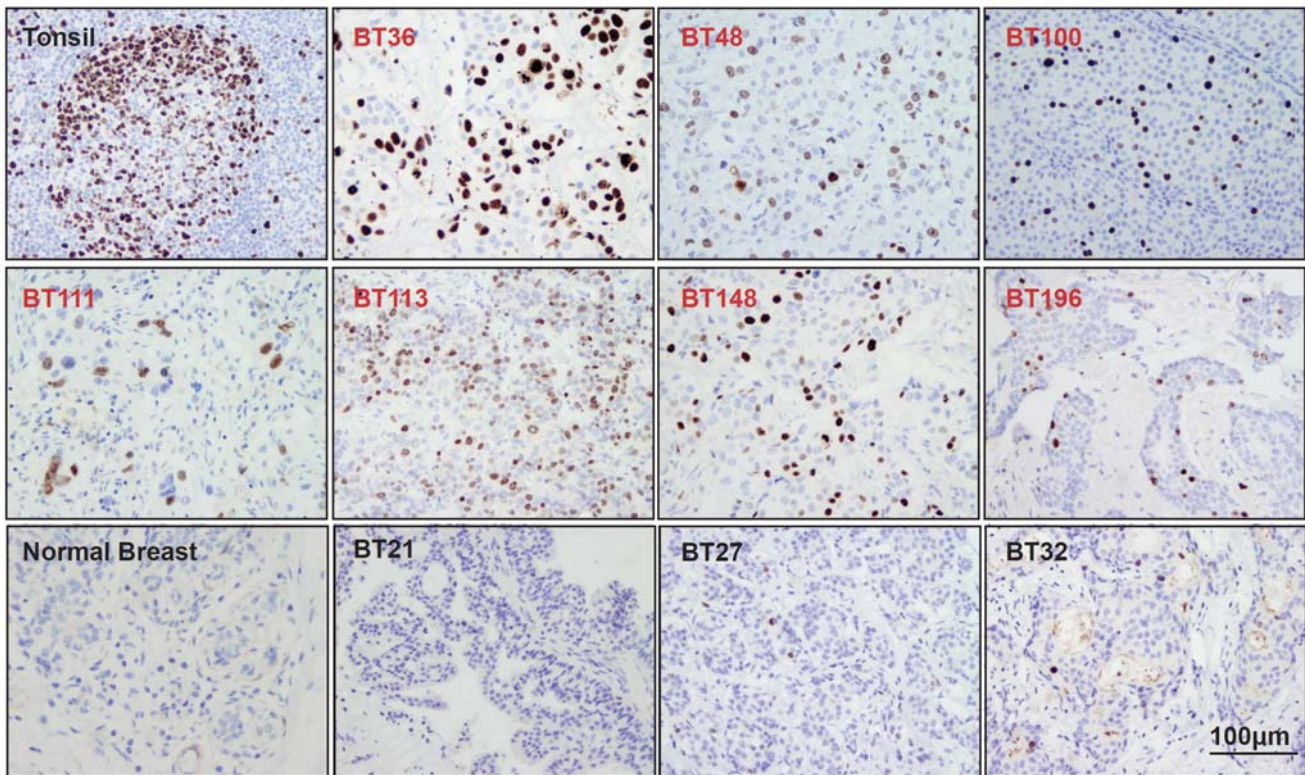

**Supplementary Figure 4. Ki67 staining of all evaluable fusion-positive and representative fusion-negative breast cancer tissues.** The fusion-positive samples are highlighted in red. Normal human tonsil tissue and normal breast tissue are used as positive and negative controls respectively.

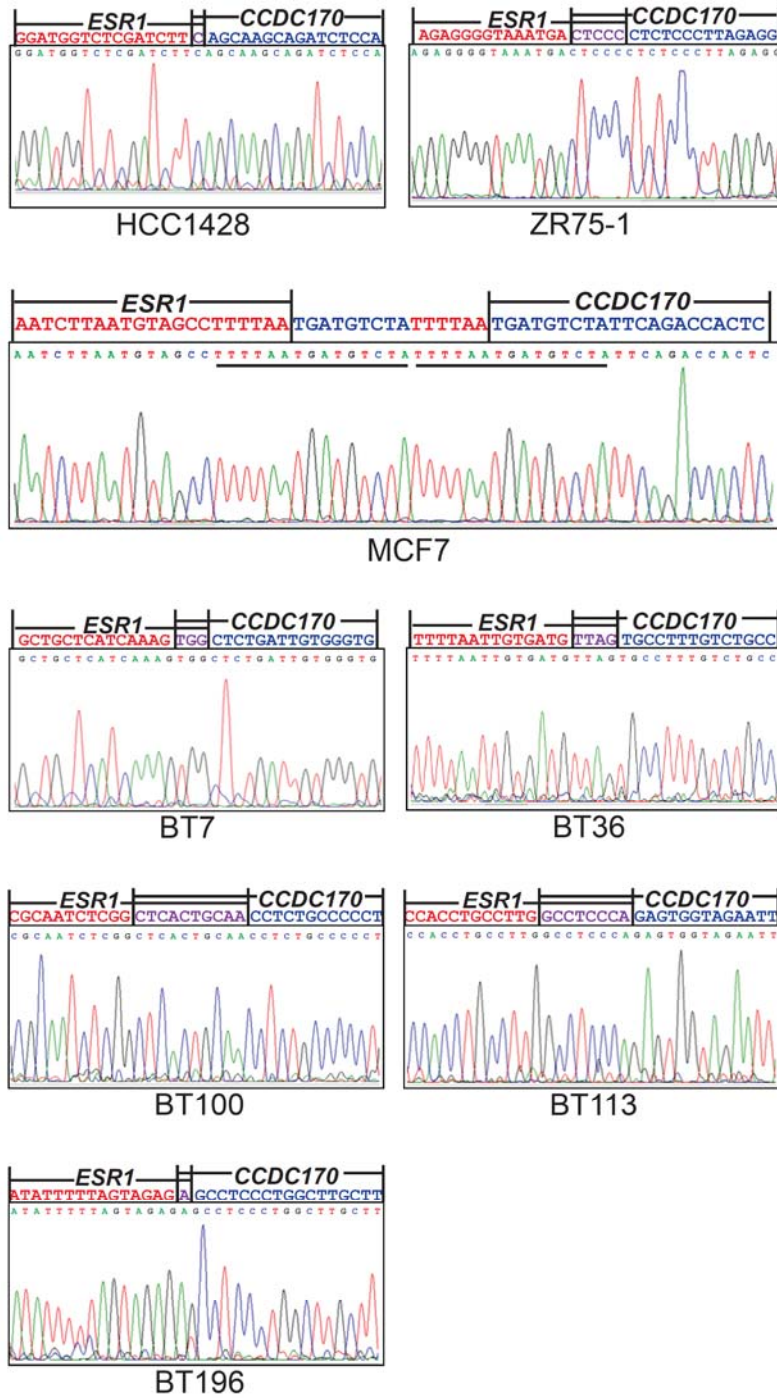

**Supplementary Figure 5. *ESR1-CCDC170* genomic fusion points in fusion positive breast cancer cell lines and tissues.** Representative capillary sequencing chromatograms of the *ESR1-CCDC170* genomic fusion junctions in the three positive breast cancer cell lines and five positive breast tumor tissues are shown.



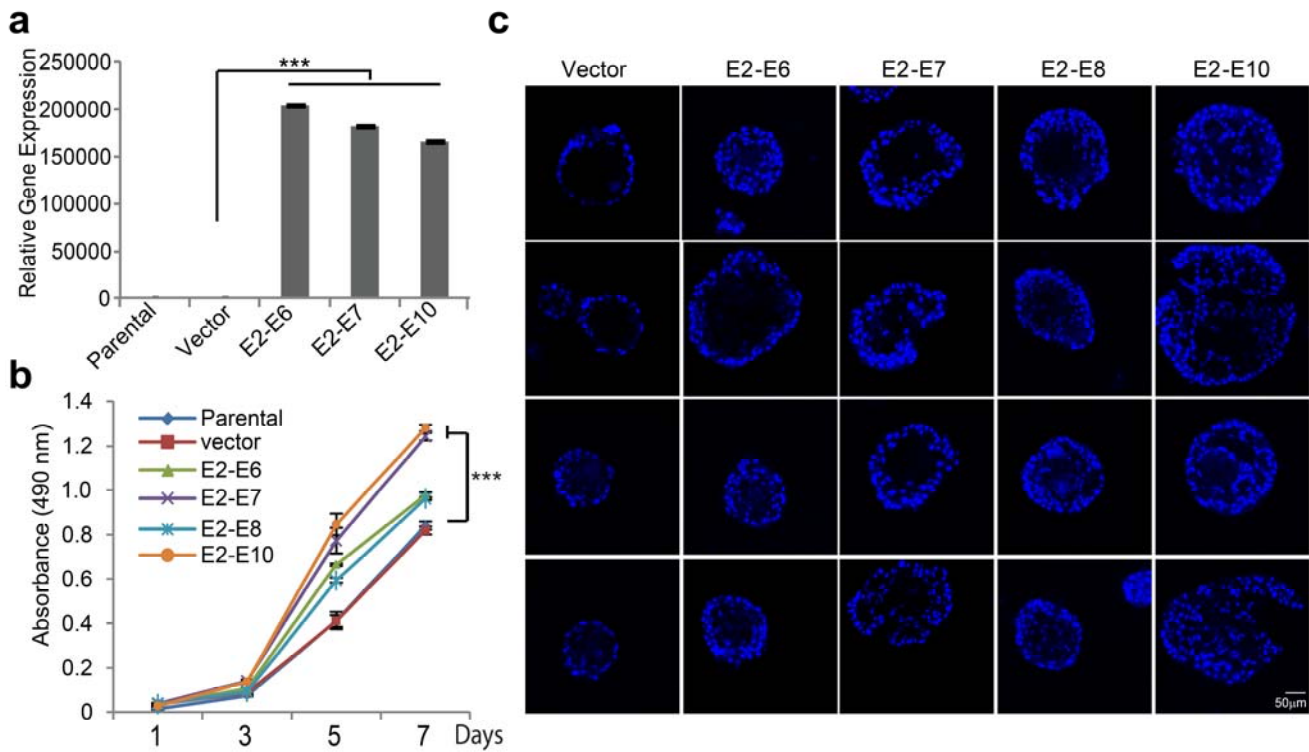

**Supplementary Figure 6. The impact of  $\Delta$ CCDC170 expression on the proliferation and acini formation of MCF10A cells.** (a) Quantitative RT-PCR validation of the expression of  $\Delta$ CCDC170 variants in transduced MCF10A cells. \*\*\* $p < 0.001$  (t-test). Error bars represent the standard deviation of two replicate measurements per condition. (b) The effect of ectopic expression of  $\Delta$ CCDC170 variants on the proliferation of MCF10A cells. \*\*\* $p < 0.001$  (t-test based on Day-7 data). Error bars represent the standard deviation of three replicate measurements per condition. (c) Representative images of MCF10A cells expressing the vector control or different  $\Delta$ CCDC170 fusion variants cultured on matrigel for 60 days. Nuclei were stained with DAPI and visualized by confocal microscopy with x40 magnification. Scale bar represents 50 $\mu$ m.

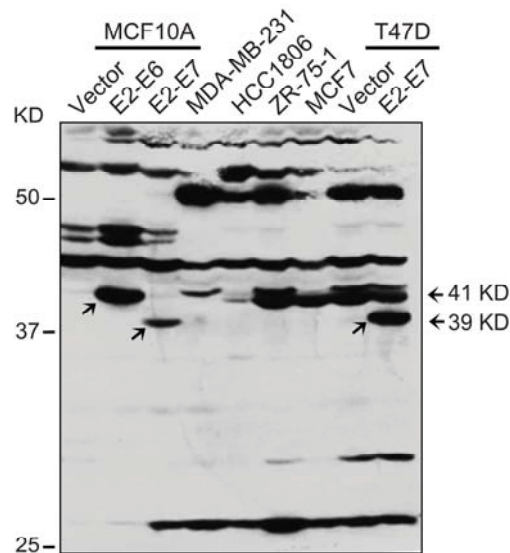

**Supplementary Figure 7. Western blot detecting the  $\Delta$ CCDC170 protein products expressed in the *ESR1-CCDC170* positive breast cancer cell lines, ZR-75-1 and MCF-7.** The engineered MCF10A and T47D cells overexpressing the indicated fusion variants and fusion-negative breast cancer cell lines, MDAMB231 and HCC1806 are used as positive or negative controls respectively. The MCF10A and T47D cells transduced with pLenti7.3 vector containing an YFP ORF is also used as negative controls (Vector). The predicted size of the protein product encoded by the E2-E6 fusion variant expressed in ZR-75-1 cells is 41KD. While the blot did reveal a 41KD band in ZR-75-1 cells, this band is also detected in the cell lines that are negative for this fusion variant suggesting the possible presence of cross-reacting proteins. We did not detect the predicted 39KD band encoded by the E2-E7 fusion variant in MCF7 cells. Presumably this could be attributable to the relative low level expression of the E2-E7 fusion in this cell line (Figure 1e).

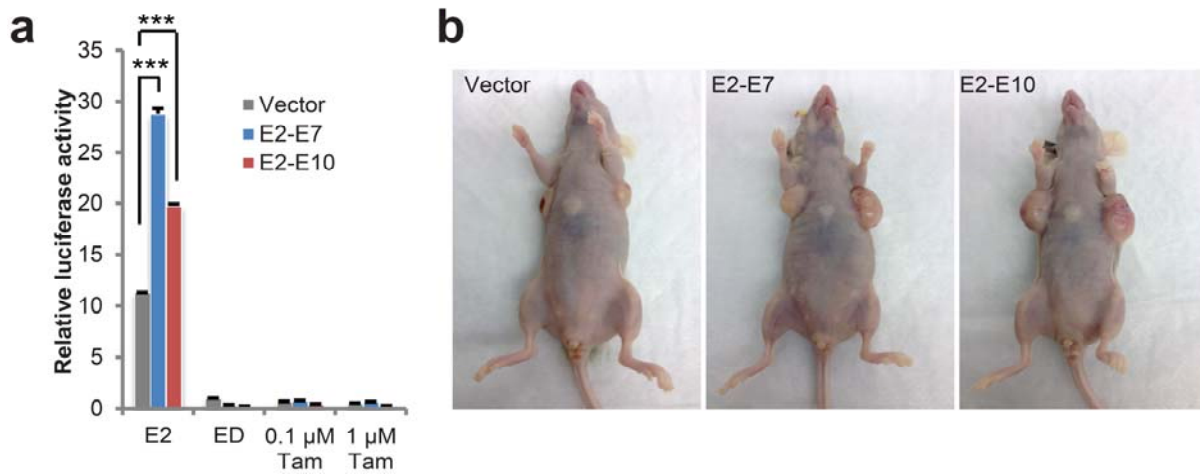

**Supplementary Figure 8. The impact of  $\Delta$ CCDC170 expression in ER+ T47D breast cancer cells on ER transcriptional activity *in vitro* and tumor formation *in vivo*.** (a) The impact of  $\Delta$ CCDC170 expression on ER transcriptional activity in T47D cells assayed by estrogen-responsive element luciferase reporter assay following estrogen (E2), estrogen deprivation (ED), or 4-OH tamoxifen treatment (Tam). Error bars represent the standard deviation of two replicate measurements per condition. \*\*\* $p < 0.001$  (t-test). (b) Representative images of xenograft tumors engrafted from T47D cells expressing the vector, E2-E7, or E2-E10  $\Delta$ CCDC170 variants in athymic nude mice.



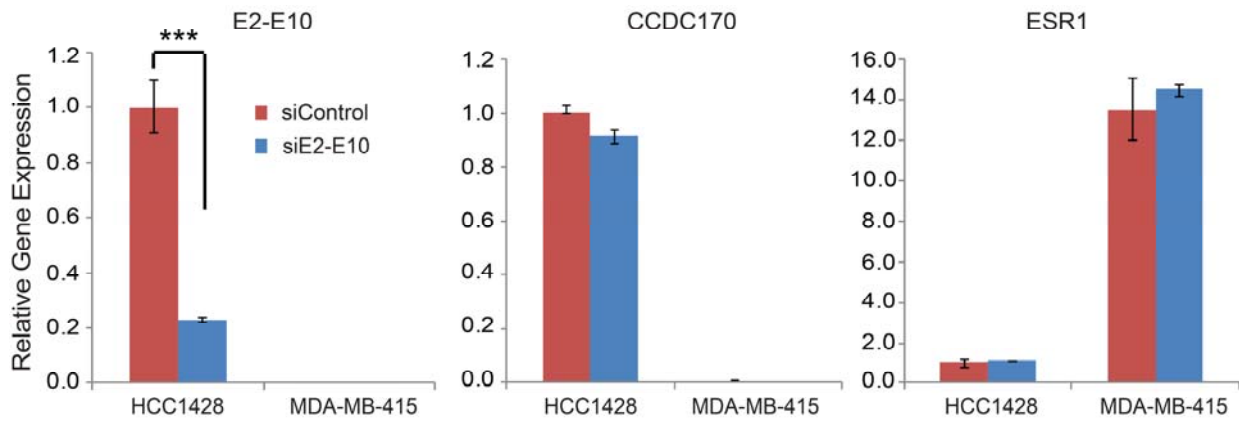

**Supplementary Figure 9. Quantitative RT-PCR validation of E2-E10 fusion, wtCCDC170 and wtESR1 expression in fusion-positive HCC1428 and fusion-negative MDA-MB-415 cell lines transfected with E2-E10 siRNA.** Error bars represent the standard deviation of two replicate measurements per condition. \*\*\*P<0.001 (t-test).

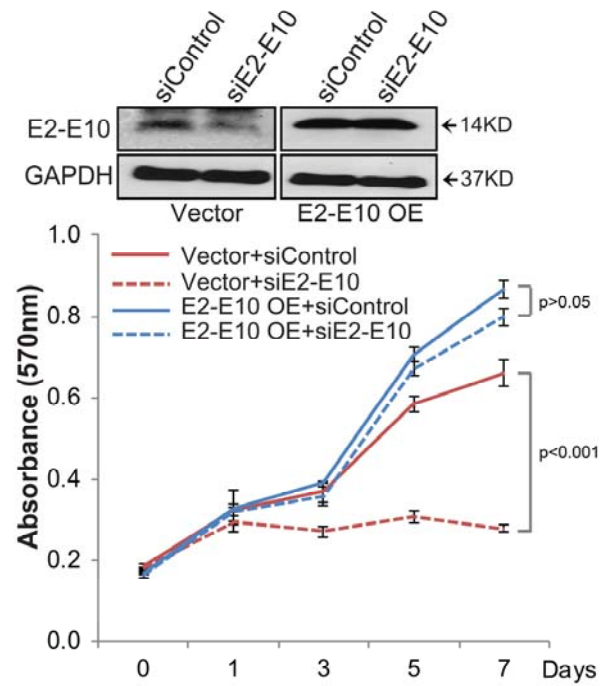

**Supplementary Figure 10. The rescue effect of forced expression of the E2-E10 ORF on the proliferation of HCC1428 cells treated with siE2-E10.** The inhibitory effect on the proliferation of HCC1428 cells resulting from E2-E10 knockdown was rescued by ectopic E2-E10 expression (MTT assay). Error bars represent the standard deviation of three replicate measurements per condition. P-value was determined using t-test based on Day 7 data.

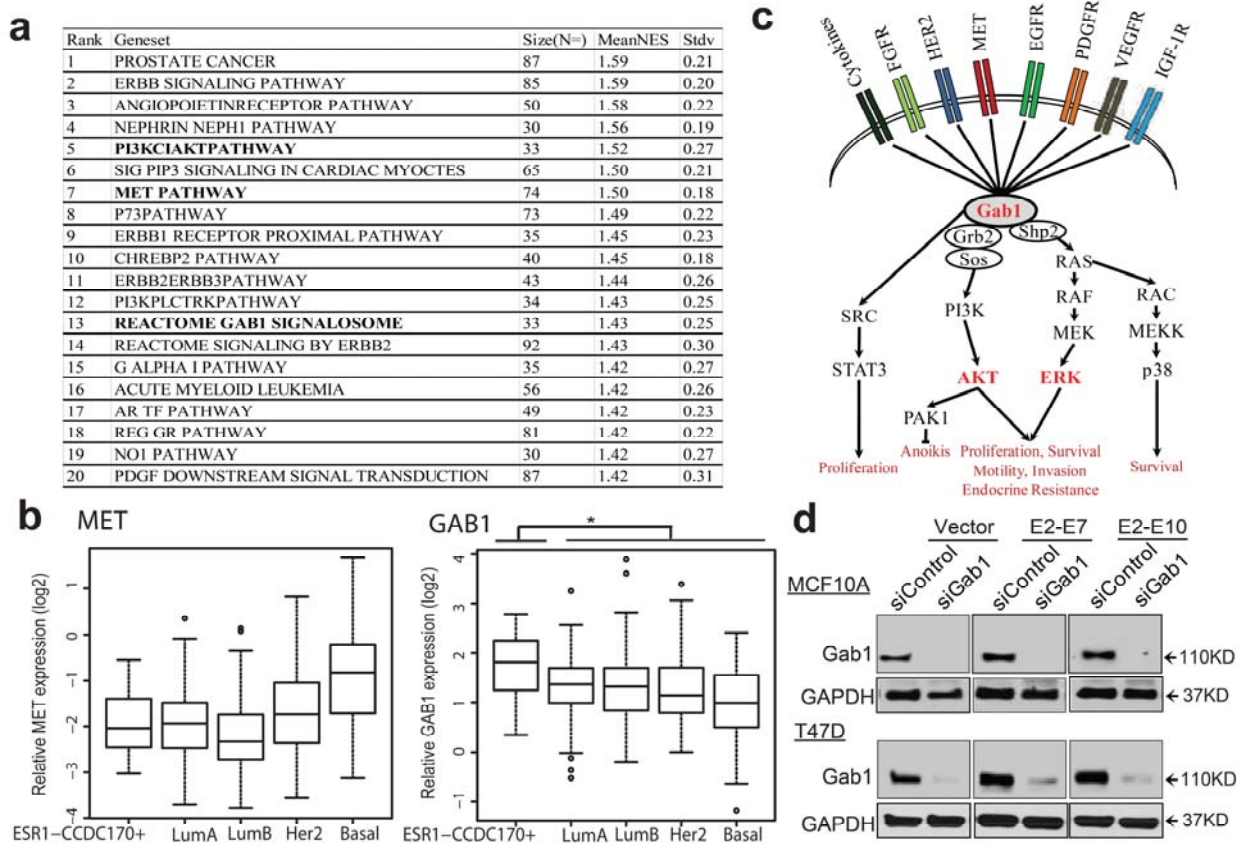

**Supplementary Figure 11. Gab1 is a crucial component of the signaling pathways activated in  $\Delta$ CCDC170 expressing ER+ breast cancer cells.** (a) Top 20 pathways upregulated in *ESR1-CCDC170* positive breast tumors, as revealed by Gene Set Enrichment Analysis (GSEA). The pathways are ranked by their mean normalized enrichment scores (mean NES). (b) The expression of c-Met and Gab1 in *ESR1-CCDC170*-positive breast tumors as opposed to the fusion-negative breast tumors of different clinical subtypes. \*  $p < 0.05$  (t-test). The gene expression data analyses in a-b are based on 12 *ESR1-CCDC170*+ cases that have available Agilent gene expression data from TCGA. The 2 cases supported by 2 fusion reads (see Supplementary Table 1) are included to increase the number of cases in the analysis. Error bars represent the standard deviations (*ESR1-CCDC170*+,  $n=12$ ; LumA,  $n=229$ ; LumB,  $n=120$ ; Her2,  $n=56$ ; Basal,  $n=96$ ). (c) Schematic of the Gab1 pathway and key signaling intermediates (based on Birchmeier *et al*, Molecular cell biology 2003 4:915, and Raghav *et al*, Transl Lung Cancer Res 2012 1:179). (d) Western blot validation of Gab1 knockdown in MCF10A and T47D cells expressing  $\Delta$ CCDC170 variants.

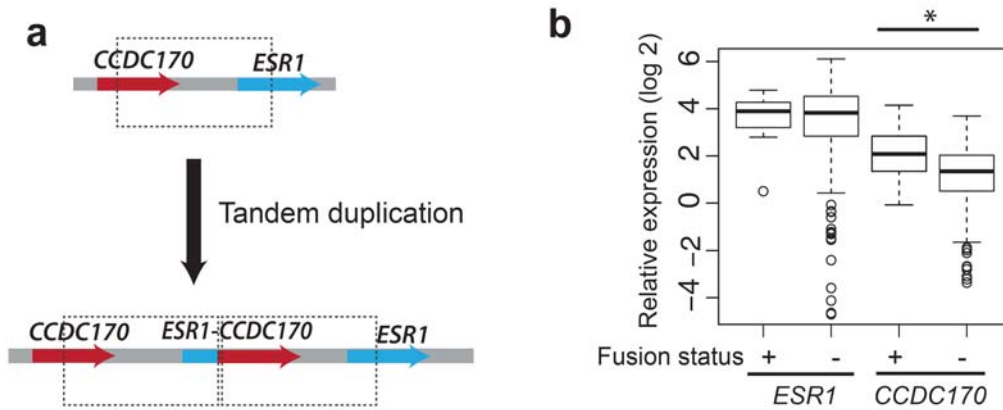

**Supplementary Figure 12. Tandem duplication as a potential genetic mechanism generating *ESR1-CCDC170* fusions.** (a) The schematic of the tandem duplication potentially generating the *ESR1-CCDC170* fusions. (b) Relative expression of wild-type *ESR1* and *CCDC170* in 12 fusion-positive and 380 fusion-negative ER+ breast cancer cases with available Agilent gene expression data. Gene expression data shown here are from TCGA. Error bars represent the standard deviation (+, n=12; -, n=380). \* p<0.05 (t-test).

**Supplementary Table 1. The clinicopathological data for the *ESR1-CCDC170* positive tumors revealed by BWA alignment of reconstructed chimerical sequences.**

| TCGA sample ID   | BWA fusion reads (n=) |           |          | CNG | PAM50 subtype |        | Histology | Receptor Status |     |           | AJCC classifications |         |    |       | MP stat |
|------------------|-----------------------|-----------|----------|-----|---------------|--------|-----------|-----------------|-----|-----------|----------------------|---------|----|-------|---------|
|                  | Total                 | Encompass | Junction |     | Gene Exp      | RNAseq |           | ER              | PR  | Her2(IHC) | T                    | N       | M  | Stage |         |
| TCGA-A1-A0SM-01  | 5                     | 2         | 3        | Yes | LumB          | LumA   | IDC       | +               | -   | +         | T2                   | N0 (i-) | M0 | IIA   | NA      |
| TCGA-A1-A0SN-01  | 21                    | 17        | 4        | Yes |               | LumB   | IDC       | +               | +   | +         | T1c                  | N1      | MX | IIA   | Post    |
| TCGA-A2-A0CT-01  | 39                    | 25        | 14       | Yes | LumB          | LumA   | IDC       | +               | -   | +/-       | T2                   | N0 (i-) | M0 | IIA   | Post    |
| TCGA-A2-A0YG-01  | 10                    | 5         | 5        | No  | LumB          | LumB   | IDC       | +               | +   | +         | T2                   | N3a     | M0 | IIIC  | Post    |
| TCGA-A2-A25B-01  | 7                     | 4         | 3        | No  |               | LumB   | IDC       | +               | +   | +/-       | T2                   | N1      | M0 | IIB   | Pre     |
| TCGA-A2-A4S3-01  | 23                    | 12        | 11       | No  |               |        | IDC       | +               | +   | -         | T2                   | N1a     | M0 | IIB   | Post    |
| TCGA-A7-A4SC-01  | 10                    | 6         | 4        | NA  |               |        | ILC       | +               | -   | +/-       | T3                   | N0      | MX | IIB   | Post    |
| TCGA-A8-A08P-01  | 6                     | 2         | 4        | No  | LumB          | LumB   | IDC       | +               | +   | +         | T2                   | N2a     | M0 | IIIA  | Post    |
| TCGA-A8-A09Q-01  | 4                     | 3         | 1        | No  | LumB          | LumB   | IDC       | +               | +   | -         | T4b                  | N2a     | M0 | IIIB  | Post    |
| TCGA-AC-A3OD-01  | 4                     | 3         | 1        | No  |               | LumA   | ILC       | +               | +   | -         | T2                   | N1mi    | MX | IIB   | Post    |
| TCGA-AN-A0AK-01  | 3                     | 0         | 3        | No  | LumB          | LumB   | IDC       | +               | -   | +         | T2                   | N0      | M0 | IIA   | Post    |
| TCGA-AN-A0FW-01* | 2                     | 0         | 2        | No  | LumA          | LumA   | IDC       | +               | +/- | -         | T2                   | N2      | M0 | IIIA  | Post    |
| TCGA-AR-A24R-01  | 69                    | 31        | 38       | Yes |               | LumB   | IDC       | +               | +   | -         | T1                   | N2      | M0 | IIIA  | Pre     |
| TCGA-BH-A0B1-01  | 5                     | 3         | 2        | No  | LumA          | LumA   | IDC       | +               | +   | -         | T2                   | N1a     | M0 | IIB   | Post    |
| TCGA-BH-A0C0-01  | 36                    | 23        | 13       | Yes | LumB          | LumB   | IDC       | +               | +   | +/-       | T1c                  | N1a     | M0 | IIA   | Post    |
| TCGA-BH-A0C7-01* | 2                     | 1         | 1        | No  | LumB          | LumB   | IDC       | +               | -   |           | T2                   | N1mi    | M0 | IIB   | Peri    |
| TCGA-BH-A0HY-01  | 5                     | 3         | 2        | Yes | Her2          | LumB   | IDC       | +               | -   | +         | T1c                  | N0      | M0 | I     | Post    |
| TCGA-BH-A18R-01  | 87                    | 47        | 40       | Yes | Her2          | Her2   | IDC       | +/-             | -   | +         | T2b                  | N1      | M0 | IIA   | NA      |
| TCGA-BH-A1EY-01  | 3                     | 0         | 3        | No  |               | LumA   | IDC       | +               | +   | -         | T2                   | N0      | M0 | IIA   | Post    |
| TCGA-BH-A1FD-01  | 39                    | 21        | 18       | Yes |               | LumB   | IDC       | +               | +   | -         | T1c                  | N0      | M0 | I     | Post    |
| TCGA-D8-A1JP-01  | 41                    | 25        | 16       | Yes |               | LumA   | IDC       | +               | +   | -         | T1c                  | N0      | M0 | IA    | Post    |
| TCGA-D8-A1XA-01  | 6                     | 2         | 4        | Yes |               | LumA   | IDC       | +               | +   | +/-       | T1c                  | N0      | M0 | IA    | Post    |
| TCGA-D8-A27N-01  | 48                    | 25        | 23       | Yes |               | LumB   | IDC       | +               | +   | +         | T2                   | N2a     | M0 | IIIA  | Pre     |

Note: Gene-expression based PAM50 subtypes are derived from TCGA publication (*Nature* 2012); RNAseq based PAM50 subtypes are derived from UCSC Cancer Genome Browser (<https://genome-cancer.ucsc.edu/>). CNG, copy-number gains between the *CCDC170* and *ESR1* genomic loci that affect 3' *CCDC170* and 5' *ESR1*. MP stat, Menopausal status. \*These two cases are marginal cases supported by two fusion reads, which are not included in the assessment of fusion-positive rates.

**Supplementary Table 2. Summary of the clinicopathological data for the breast tumor samples analyzed in this study**

| Sample ID | AGE | Sex | Race      | RT-PCR | Capillary Sequencing | gPCR | MP stat | ER | PR | HER-2 | Grade | AJCC TNM | AJCC Stage | Ki67 Index (%) |
|-----------|-----|-----|-----------|--------|----------------------|------|---------|----|----|-------|-------|----------|------------|----------------|
| BT1       | 75  | F   | Caucasian | -      |                      |      | Post    | +  | +  | -     | 1     | T2NXM0   | IIA        | 9.73           |
| BT2       | 68  | F   | Caucasian | -      |                      |      | Post    | +  | -  | -     | 2     | T1cNXM0  | I          | 12.98          |
| BT3       | 64  | F   | Caucasian | -      |                      |      | Post    | +  | -  | -     | 2     | T1NXM0   | I          | 0.40           |
| BT4       | 37  | F   | Caucasian | -      |                      |      | NA      | +  | -  | NA    | 1     | T2N1MX   | IIB        | 21.15          |
| BT5       | 49  | F   | Caucasian | -      |                      |      | Pre     | +  | +  | -     | 1     | T1cNXM0  | I          |                |
| BT6       | 70  | F   | Caucasian | -      |                      |      | Post    | +  | +  | -     | 2     | T2N2M0   | IIIA       | 10.97          |
| BT7       | 63  | F   | Caucasian | +      | Yes                  | +    | Post    | +  | +  | -     | 2     | T2N0M0   | IIA        |                |
| BT8       | 51  | F   | Caucasian | -      |                      |      | NA      | +  | -  | -     | 2     | T1N0M0   | I          | 0.40           |
| BT9       | NA  | F   | Caucasian | -      |                      |      | NA      | +  | +  | -     | 1     | T1N0M0   | I          | 8.79           |
| BT10      | 74  | F   | Caucasian | -      |                      |      | Post    | +  | +  | -     | 1     | T2NXM0   | IIA        | 6.00           |
| BT11      | 46  | F   | Caucasian | -      |                      |      | Pre     | +  | +  | -     | 1     | T2N2M0   | IIIA       | 13.06          |
| BT12      | NA  | F   | Caucasian | Weak   | Yes                  |      | Post    | +  | -  | -     | 1     | T1cN1MX  | IIA        | 7.00           |
| BT13      | 47  | F   | Caucasian | -      |                      |      | Pre     | +  | +  | -     | 1     | T2N1M0   | IIB        | 22.74          |
| BT14      | 53  | F   | Caucasian | -      |                      |      | Post    | +  | +  | -     | 1     | T4N2M0   | IIIB       | 56.00          |
| BT15      | 32  | F   | Caucasian | -      |                      |      | Pre     | +  | -  | +     | 1     | T2NXM0   | IIA        | 22.39          |
| BT16      | 51  | F   | Caucasian | -      |                      |      | Pre     | +  | -  | -     | 1     | T1N0M0   | I          | 5.00           |
| BT17      | 69  | F   | Caucasian | -      |                      |      | Post    | +  | +  | -     | 2     | T2N0M0   | IIA        | 16.60          |
| BT18      | 53  | F   | Caucasian | -      |                      |      | Pre     | +  | +  | -     | 1     | T2N0M0   | IIA        | 2.06           |
| BT19      | 53  | F   | Caucasian | -      |                      |      | Pre     | +  | +  | NA    | 1     | T1cN1MX  | IIA        | 28.00          |
| BT20      | 56  | F   | Caucasian | -      |                      |      | Post    | +  | +  | -     | 1     | T1NXMX   | I          | 21.25          |
| BT21      | 69  | F   | Caucasian | Weak   | Yes                  |      | Post    | +  | -  | -     | 3     | T4N1M0   | IIIB       | 2.67           |
| BT22      | 40  | F   | Caucasian | Weak   | Yes                  |      | NA      | +  | +  | -     | 1     | T1cN1M0  | IIA        | 25.13          |
| BT23      | 58  | F   | Caucasian | Weak   | Yes                  |      | Post    | +  | +  | -     | 1     | T2N1M0   | IIB        | 23.00          |
| BT24      | 74  | F   | Caucasian | Weak   | Yes                  |      | Post    | +  | +  | -     | 1     | T2NXMX   | IIA        | 14.34          |
| BT25      | 48  | F   | Caucasian | Weak   | Yes                  |      | Pre     | +  | +  | -     | 1     | T2NXM0   | IIA        | 27.20          |
| BT26      | 59  | F   | Caucasian | -      |                      |      | Post    | +  | +  | -     | 1     | T2N1M0   | IIB        | 44.56          |
| BT27      | 74  | F   | Caucasian | -      |                      |      | Post    | +  | -  | -     | 2     | T1N1M0   | IIA        | 3.81           |
| BT28      | 53  | F   | Caucasian | -      |                      |      | Post    | +  | -  | -     | 1     | T1N1M0   | IIA        | 3.00           |
| BT29      | 52  | F   | Caucasian | -      |                      |      | Pre     | +  | +  | -     | 1     | T2NXM0   | IIA        | 6.18           |
| BT30      | 73  | F   | Caucasian | -      |                      |      | Post    | +  | -  | -     | 2     | T2NXM0   | IIA        | 12.62          |
| BT31      | 55  | F   | Caucasian | -      |                      |      | Post    | +  | +  | -     | 1     | T2NXM0   | IIA        | 18.00          |
| BT32      | 39  | F   | Caucasian | -      |                      |      | Pre     | +  | +  | -     | 1     | T2NXM0   | IIA        | 4.00           |
| BT33      | 36  | F   | Caucasian | -      |                      |      | Pre     | +  | -  | -     | 1     | T1NXM0   | I          | 6.12           |



|      |    |   |                  |      |     |   |      |    |    |    |   |         |      |       |
|------|----|---|------------------|------|-----|---|------|----|----|----|---|---------|------|-------|
| BT34 | 51 | F | Caucasian        | -    |     |   | Pre  | +  | +  | -  | 1 | T2NXM0  | II   | 6.00  |
| BT35 | 52 | F | Caucasian        | -    |     |   | Pre  | +  | -  | -  | 1 | T2N2M0  | IIIA | 38.74 |
| BT36 | 62 | F | Caucasian        | +    | Yes | + | Post | +  | -  | NA | 1 | T2N2M0  | IIIA | 64.07 |
| BT37 | NA | F | Caucasian        | -    |     |   | Pre  | +  | +  | +  | 2 | T2N2M0  | IIIA |       |
| BT38 | 62 | F | Caucasian        | -    |     |   | Post | +  | -  | NA | 1 | T1cNXM0 | I    | 13.44 |
| BT39 | 44 | F | Caucasian        | -    |     |   | Pre  | +  | +  | -  | 1 | T1N1M0  | IIA  | 32.50 |
| BT40 | 68 | F | Caucasian        | -    |     |   | Post | +  | +  | -  | 1 | T4NXM0  | IIIB | 5.70  |
| BT41 | 41 | F | Caucasian        | -    |     |   | Pre  | +  | +  | -  | 1 | T2NXM0  | IIA  | 20.70 |
| BT42 | 45 | F | Caucasian        | -    |     |   | Pre  | +  | +  | -  | 2 | T2N1M0  | IIB  | 30.00 |
| BT43 | 74 | F | Caucasian        | -    |     |   | Post | +  | +  | NA | 1 | T2N1M0  | IIB  | 22.00 |
| BT44 | 71 | F | Caucasian        | -    |     |   | Post | +  | -  | -  | 1 | T2NXM0  | IIA  | 41.00 |
| BT45 | 61 | F | Caucasian        | -    |     |   | Post | +  | +  | -  | 1 | T1cNXM0 | I    | 38.00 |
| BT46 | 70 | F | Caucasian        | Weak | Yes |   | Post | +  | -  | NA | 1 | T2N1M0  | IIB  | 17.00 |
| BT47 | 70 | F | Caucasian        | -    |     |   | Post | +  | +  | -  | 1 | T1cNXM0 | I    | 11.50 |
| BT48 | 56 | F | Caucasian        | +    | Yes |   | NA   | +  | -  | -  | 1 | T1NXM0  | I    | 28.96 |
| BT49 | 47 | F | Caucasian        | -    |     |   | Post | +  | +  | -  | 1 | T2N2M0  | IIIA | 32.00 |
| BT50 | 77 | F | Caucasian        | -    |     |   | Post | +  | +  | -  | 1 | T2N0M0  | IIA  | 22.00 |
| BT51 | 47 | F | Caucasian        | Weak | Yes |   | Pre  | +  | +  | -  | 1 | T2N0M0  | IIA  | 27.88 |
| BT52 | 58 | F | Caucasian        | -    |     |   | Post | +  | +  | -  | 1 | T1cNXM0 | I    | 2.92  |
| BT53 | 36 | F | Asian            | -    |     |   | Pre  | NA | NA | NA | 1 |         |      |       |
| BT54 | 42 | F | Caucasian        | -    |     |   | Pre  | +  | -  | -  | 1 | T1N0M0  | I    | 2.12  |
| BT55 | 59 | F | Caucasian        | -    |     |   | NA   | +  | +  | -  | 2 | T1N1M0  | IIA  | 6.50  |
| BT56 | 52 | F | Caucasian        | -    |     |   | Post | +  | -  | -  | 2 | T1N1M0  | IIA  | 42.00 |
| BT57 | 43 | F | Caucasian        | -    |     |   | Pre  | +  | +  | NA | 1 | T2N2M0  | IIIA | 15.68 |
| BT58 | 65 | F | Caucasian        | Weak | Yes |   | Post | +  | +  | -  | 2 | T2NXMX  | IIA  | 8.00  |
| BT59 | 53 | F | Caucasian        | -    |     |   | Pre  | +  | +  | -  | 1 | T2N1M0  | IIB  | 3.29  |
| BT60 | 75 | F | Caucasian        | -    |     |   | Post | +  | -  | -  | 1 | T2N1M0  | IIB  | 7.32  |
| BT61 | 79 | F | Caucasian        | -    |     |   | Post | +  | +  | -  | 2 | T4N2M0  | IIIB | 19.00 |
| BT62 | 45 | F | Caucasian        | -    |     |   | Pre  | +  | +  | -  | 2 | T2NXMX  | IIA  | 6.20  |
| BT63 | 79 | F | Caucasian        | -    |     |   | Post | +  | +  | -  | 2 | T2NXM0  | IIA  | 18.73 |
| BT64 | 46 | F | Caucasian        | -    |     |   | Pre  | +  | +  | -  | 1 | T1cNXM0 | I    | 12.57 |
| BT65 | 59 | F | Caucasian        | -    |     |   | Post | +  | +  | -  | 1 | T1NXM0  | I    | 11.40 |
| BT66 | 43 | F | Caucasian        | -    |     |   | Pre  | +  | +  | -  | 1 | T2N0M0  | IIA  | 0.60  |
| BT67 | 52 | F | African American | -    |     |   | Post | +  | +  | -  | 1 | T2N2M0  | IIIA | 13.11 |
| BT68 | 68 | F | Caucasian        | -    |     |   | Post | +  | -  | -  | 1 | T3N1M0  | IIIA | 0.99  |

|       |    |   |           |      |     |      |      |   |    |   |         |        |       |       |
|-------|----|---|-----------|------|-----|------|------|---|----|---|---------|--------|-------|-------|
| BT69  | 45 | F | Caucasian | -    |     | NA   | +    | - | -  | 1 | T2N0M0  | IIA    | 12.98 |       |
| BT70  | 53 | F | Caucasian | -    |     | Post | +    | + | NA | 1 | T2N3M0  | IIIC   | 13.15 |       |
| BT71  | 53 | F | Caucasian | -    |     | Pre  | +    | + | -  | 1 | T2N0MX  | IIA    | 10.62 |       |
| BT72  | 44 | F | Caucasian | Weak | Yes | Pre  | +    | - | +  | 1 | T2N2M0  | IIIA   | 20.63 |       |
| BT73  | 50 | F | Caucasian | -    |     | Pre  | +    | + | -  | 1 | T2N3M0  | IIIC   | 10.17 |       |
| BT74  | 37 | F | Caucasian | -    |     | Pre  | +    | + | -  | 1 | T3N1M0  | IIIA   | 17.67 |       |
| BT75  | 51 | F | Caucasian | -    |     | Pre  | +    | + | -  | 1 | T2N1M0  | IIB    | 27.97 |       |
| BT76  | 55 | F | Caucasian | -    |     | Post | +    | + | -  | 1 | T2N0M0  | IIA    | 10.10 |       |
| BT77  | 56 | F | Caucasian | -    |     | NA   | +    | + | -  | 1 | T2N1M0  | IIB    | 6.76  |       |
| BT78  | 65 | F | Caucasian | -    |     | Post | +    | + | -  | 2 | T1bN0M0 | I      | 8.46  |       |
| BT79  | 47 | F | Caucasian | Weak | Yes | NA   | +    | + | -  | 1 | T1N1M0  | IIA    | 44.00 |       |
| BT80  | 64 | F | Caucasian | -    |     | Post | +    | + | -  | 1 | T2N1M0  | IIB    | 7.33  |       |
| BT81  | 67 | F | Caucasian | -    |     | Post | +    | + | -  | 2 | T2N0M0  | IIA    | 0.20  |       |
| BT82  | 48 | F | Caucasian | -    |     | NA   | +    | + | NA | 1 | T2N2M0  | IIIA   | 33.25 |       |
| BT83  | 47 | F | Caucasian | -    |     | NA   | +    | - | +  | 1 | T1cN0M0 | I      | 6.43  |       |
| BT84  | NA | F | Caucasian | -    |     | NA   | +    | + | NA | 1 | T1N1M0  | IIA    | 9.91  |       |
| BT85  | NA | F | Caucasian | -    |     | NA   | +    | - | NA | 1 | T2NXM0  | IIA    | 11.05 |       |
| BT86  | 81 | F | Caucasian | -    |     | Post | +    | + | -  | 1 | T2N1aM0 | IIB    | 0.20  |       |
| BT87  | 53 | F | Caucasian | -    |     | Post | +    | + | -  | 1 | T1NXM0  | I      | 18.34 |       |
| BT88  | 47 | F | Caucasian | -    |     | Pre  | +    | + | NA | 1 | T2N0M0  | IIA    | 27.48 |       |
| BT89  | 79 | F | Caucasian | -    |     | Post | +    | - | NA | 1 | T4N1M0  | IIIB   | 31.73 |       |
| BT90  | 88 | F | Caucasian | -    |     | Post | +    | + | -  | 1 | T1N0M0  | I      | 10.99 |       |
| BT91  | 45 | F | Caucasian | -    |     | Pre  | +    | + | -  | 1 | T2N2M0  | IIIA   | 10.66 |       |
| BT92  | 69 | F | Caucasian | -    |     | Post | +    | - | NA | 1 | T1N2M0  | IIIA   | 24.07 |       |
| BT93  | 66 | F | Caucasian | Weak | Yes | Post | +    | + | -  | 1 | T1N0M0  | I      | 0.39  |       |
| BT94  | 54 | F | Caucasian | -    |     | Pre  | +    | + | -  | 3 | T4N3M0  | IIIC   | 7.14  |       |
| BT95  | 41 | F | Caucasian | Weak | Yes | Pre  | +    | + | NA | 1 | T2N1M0  | IIB    | 26.34 |       |
| BT96  | 56 | F | Caucasian | -    |     | Post | +    | + | -  | 2 | T2N2M0  | IIIA   | 17.57 |       |
| BT97  | 51 | F | Caucasian | -    |     | Post | +    | - | -  | 1 | T1NXM0  | I      | 18.00 |       |
| BT98  | 51 | F | Caucasian | -    |     | Post | +    | + | -  | 1 | T1NXM0  | I      | 9.07  |       |
| BT99  | 39 | F | Caucasian | -    |     | Pre  | +    | + | NA | 1 | T2NXM0  | IIA    | 23.87 |       |
| BT100 | 70 | F | Caucasian | +    | Yes | +    | Post | + | +  | - | 1       | T2N0M0 | IIA   | 17.41 |
| BT101 | 78 | F | Caucasian | -    |     | Post | +    | + | -  | 1 | T2NXM0  | IIA    | 11.01 |       |
| BT102 | 60 | F | Caucasian | -    |     | Post | +    | - | -  | 1 | T2N1M0  | IIB    | 70.97 |       |
| BT103 | 74 | F | Caucasian | -    |     | Post | +    | - | -  | 1 | T4N1M0  | IIIB   | 13.12 |       |
| BT104 | 66 | F | Caucasian | -    |     | Post | +    | - | -  | 2 | T2N0M0  | IIA    | 11.38 |       |

|       |    |   |           |      |     |   |      |   |   |    |   |         |      |       |
|-------|----|---|-----------|------|-----|---|------|---|---|----|---|---------|------|-------|
| BT105 | 58 | F | Caucasian | -    |     |   | Pre  | + | + | -  | 1 | T1cN1M0 | IIA  | 2.00  |
| BT106 | 32 | F | Caucasian | -    |     |   | Pre  | + | - | +  | 1 | T2NXM0  | IIA  |       |
| BT107 | 45 | F | Caucasian | -    |     |   | Pre  | + | - | -  | 1 | T4N1M0  | IIIB | 8.06  |
| BT108 | 46 | F | Caucasian | -    |     |   | Pre  | + | + | -  | 1 | T3N1M0  | IIIA | 36.28 |
| BT109 | 55 | F | Caucasian | -    |     |   | Post | + | - | -  | 1 | T2NXMX  | IIA  | 28.22 |
| BT110 | 67 | F | Caucasian | Weak | Yes |   | Post | + | + | -  | 1 | T2N0M0  | IIA  | 0.39  |
| BT111 | 65 | F | Caucasian | +    | Yes |   | Post | + | - | -  | 1 | T1N0M0  | I    | 39.37 |
| BT112 | 41 | F | Caucasian | -    |     |   | Pre  | + | + | -  | 2 | T2N0M0  | IIA  | 0.99  |
| BT113 | 65 | F | Caucasian | +    | Yes | + | Post | + | - | -  | 1 | T1cN2M0 | IIIA | 36.13 |
| BT114 | NA | F | Caucasian | -    |     |   | Post | + | - | +  | 1 | T2N0M0  | IIA  | 0.59  |
| BT115 | 61 | F | Caucasian | -    |     |   | Post | + | + | -  | 1 | T2N0MX  | IIA  | 0.60  |
| BT116 | 32 | F | Caucasian | -    |     |   | Pre  | + | + | +  | 1 | T2N0M0  | IIA  | 13.66 |
| BT117 | 59 | F | Caucasian | -    |     |   | Post | + | + | -  | 2 | T2N0M0  | IIA  | 12.00 |
| BT118 | 43 | F | Caucasian | -    |     |   | Post | + | + | -  | 1 | T4N1M0  | IIIB | 9.26  |
| BT119 | 42 | F | Caucasian | -    |     |   | Pre  | + | + | -  | 2 | T2N0M0  | IIA  | 24.02 |
| BT120 | 55 | F | Caucasian | -    |     |   | Post | + | + | -  | 1 | T2N2M0  | IIIA | 6.68  |
| BT121 | 72 | F | Caucasian | -    |     |   | Post | + | + | -  | 1 | T2NXM0  | IIA  | 10.97 |
| BT122 | 53 | F | Caucasian | -    |     |   | Post | + | + | -  | 2 | T2N0M0  | IIA  |       |
| BT123 | 69 | F | Caucasian | -    |     |   | Pre  | + | + | -  | 1 | T3N0M0  | IIB  | 7.55  |
| BT124 | 50 | F | Caucasian | -    |     |   | Post | + | + | -  | 1 | T2N0M0  | IIA  | 17.25 |
| BT125 | 66 | F | Caucasian | Weak | Yes |   | Post | + | - | NA | 1 | T2N1M0  | IIB  | 12.98 |
| BT126 | 51 | F | Caucasian | -    |     |   | Post | + | - | NA | 1 | T2N1MX  | IIB  | 28.48 |
| BT127 | 59 | F | Caucasian | Weak | Yes |   | Post | + | - | NA | 1 | T2N1MX  | IIB  | 5.00  |
| BT128 | 50 | F | Caucasian | -    |     |   | Post | + | + | NA | 2 | T1N1M0  | IIA  | 12.00 |
| BT129 | 50 | F | Caucasian | -    |     |   | Post | + | - | +  | 2 | T2N0M0  | IIA  | 19.00 |
| BT130 | NA | F | Caucasian | -    |     |   | NA   | + | + | NA | 1 | T1N2M0  | IIIA | 13.17 |
| BT131 | NA | F | Caucasian | -    |     |   | NA   | + | + | NA | 1 | T2N1M0  | IIB  | 6.00  |
| BT132 | 54 | F | Caucasian | -    |     |   | Post | + | + | NA | 2 | T1N1M0  | IIA  | 24.69 |
| BT133 | 51 | F | Caucasian | -    |     |   | Post | + | + | +  | 1 | T1N0M0  | I    | 28.46 |
| BT134 | 75 | F | Caucasian | -    |     |   | Post | + | + | NA | 1 | T2NXMX  | IIA  | 0.60  |
| BT135 | 57 | F | Caucasian | Weak | Yes |   | Post | + | + | -  | 1 | T2NXM0  | IIA  | 43.43 |
| BT136 | 77 | F | Caucasian | -    |     |   | Post | + | + | NA | 1 | T1NXM0  | I    | 6.74  |
| BT137 | 58 | F | Caucasian | Weak | Yes |   | Post | + | - | NA | 1 | T1cNXM0 | I    | 51.92 |
| BT138 | 68 | F | Caucasian | -    |     |   | Post | + | + | NA | 1 | T2N2M0  | IIIA | 38.32 |
| BT139 | 60 | F | Caucasian | -    |     |   | Post | + | + | NA | 1 | T1NXM0  | I    | 36.59 |
| BT140 | 69 | F | Caucasian | -    |     |   | Post | + | + | NA | 1 | T2NXM0  | IIA  | 53.42 |

|       |    |   |           |      |     |      |   |   |    |   |         |      |       |
|-------|----|---|-----------|------|-----|------|---|---|----|---|---------|------|-------|
| BT141 | 64 | F | Caucasian | Weak | Yes | Post | + | + | NA | 1 | T2N1M0  | IIB  | 29.34 |
| BT142 | 64 | F | Caucasian | Weak | Yes | Post | + | + | NA | 3 | T2NXMX  | IIA  | 8.13  |
| BT143 | 68 | F | Caucasian | -    |     | Post | + | + | -  | 3 | T2NXM0  | IIA  | 19.21 |
| BT144 | 59 | F | Caucasian | -    |     | Post | + | + | NA | 1 | T2NXM0  | IIA  | 13.37 |
| BT145 | 53 | F | Caucasian | -    |     | Post | + | + | NA | 1 | T1cNXMX | IC   | 27.85 |
| BT146 | 65 | F | Caucasian | -    |     | Post | + | + | NA | 2 | T2N1M0  | IIB  | 6.24  |
| BT147 | 43 | F | Caucasian | -    |     | Post | + | - | NA | 1 | T4N2MX  | IIIB | 3.43  |
| BT148 | 70 | F | Caucasian | +    | Yes | Post | + | + | NA | 1 | T4N2MX  | IIIB | 30.75 |
| BT149 | 37 | F | Caucasian | -    |     | Pre  | + | + | NA | 1 | T1N0MX  | I    | 6.70  |
| BT150 | 67 | F | Caucasian | -    |     | Post | + | + | NA | 1 | T2N1M0  | IIB  | 4.44  |
| BT151 | 56 | F | Caucasian | -    |     | Post | + | + | NA | 1 | T2NXM0  | IIA  | 7.73  |
| BT152 | 86 | F | Caucasian | -    |     | Post | + | - | -  | 1 | T2NXM0  | IIA  | 0.40  |
| BT153 | 72 | F | Caucasian | -    |     | Post | + | + | -  | 3 | T1N0M0  | I    | 11.84 |
| BT154 | 37 | F | Caucasian | -    |     | Pre  | + | + | NA | 1 | T2NXM0  | IIA  | 34.64 |
| BT155 | 68 | F | Caucasian | -    |     | Post | + | - | +  | 2 | T1cN0M0 | I    | 2.95  |
| BT156 | 30 | F | Caucasian | -    |     | Pre  | + | + | NA | 1 | T1N0M0  | I    | 8.42  |
| BT157 | 48 | F | Caucasian | -    |     | Post | + | + | NA | 1 | T1cN0M0 | I    | 10.30 |
| BT158 | 59 | F | Caucasian | -    |     | Post | + | + | NA | 1 | T1cNXM0 | I    | 13.22 |
| BT159 | 41 | F | Caucasian | -    |     | Pre  | + | - | -  | 1 | T2N1MX  | IIB  | 0.79  |
| BT160 | 58 | F | Caucasian | Weak | Yes | Post | + | + | -  | 1 | T1N0M0  | I    | 32.25 |
| BT161 | 54 | F | Caucasian | -    |     | Post | + | + | -  | 2 | T2N1M0  | IIB  | 20.62 |
| BT162 | 47 | F | Caucasian | -    |     | NA   | + | + | NA | 1 | T1cN0M0 | I    | 1.38  |
| BT163 | 71 | F | Caucasian | -    |     | Post | + | + | NA | 1 | T2NXMX  | IIA  | 13.29 |
| BT164 | 51 | F | Caucasian | -    |     | NA   | + | + | NA | 1 | T3N0MX  | IIB  | 19.75 |
| BT165 | 58 | F | Caucasian | Weak | Yes | Post | + | + | NA | 1 | T1cN1M0 | IIB  | 8.75  |
| BT166 | 69 | F | Caucasian | -    |     | Post | + | + | NA | 1 | T1cN1M0 | IIA  | 8.38  |
| BT167 | 47 | F | Caucasian | -    |     | NA   | + | + | NA | 1 | T1cN2M0 | IIIA | 0.40  |
| BT168 | 53 | F | Caucasian | -    |     | Post | + | - | NA | 1 | T1cN0MX | I    | 9.78  |
| BT169 | NA | F | Caucasian | -    |     | Post | + | + | NA | 3 | T1N0M0  | I    | 12.42 |
| BT170 | 70 | F | Caucasian | -    |     | Post | + | + | -  | 2 | T2N3M0  | IIIC | 2.96  |
| BT171 | 71 | F | Caucasian | -    |     | Post | + | - | NA | 1 | T1cN2M0 | IIIA | 2.93  |
| BT172 | 44 | F | Caucasian | -    |     | Pre  | + | + | -  | 1 | T2N0M0  | IIA  | 0.60  |
| BT173 | 63 | F | Caucasian | -    |     | Post | + | + | +  | 1 | T1cN0M0 | I    | 13.27 |
| BT174 | 45 | F | Caucasian | -    |     | NA   | + | - | -  | 3 | T1cN0M0 | I    | 0.99  |
| BT175 | 37 | F | Caucasian | -    |     | Pre  | + | + | NA | 1 | T1cN1M0 | IIA  | 27.07 |
| BT176 | 42 | F | Caucasian | -    |     | Pre  | + | + | NA | 1 | T1cNXM0 | I    | 56.76 |

|       |    |   |           |      |     |   |      |   |   |    |   |         |      |       |
|-------|----|---|-----------|------|-----|---|------|---|---|----|---|---------|------|-------|
| BT177 | 70 | F | Caucasian | -    |     |   | Post | + | + | NA | 1 | T2N0M0  | IIA  | 15.68 |
| BT178 | 56 | F | Caucasian | -    |     |   | Post | + | + | -  | 1 | T1NXM0  | I    | 38.34 |
| BT179 | 50 | F | Caucasian | -    |     |   | Pre  | + | + | NA | 1 | T1cN1M0 | IIA  | 22.13 |
| BT180 | 44 | F | Asian     | -    |     |   | Pre  | + | - | +  | 1 | T2NXMX  | IIA  | 47.36 |
| BT181 | 81 | F | Caucasian | Weak | Yes |   | Post | + | + | NA | 1 | T2N0MX  | IIA  | 15.50 |
| BT182 | 39 | F | Caucasian | -    |     |   | Pre  | + | + | -  | 1 | T2NXM0  | IIA  | 4.14  |
| BT183 | 52 | F | Asian     | -    |     |   | Post | + | + | NA | 1 | T2N2M0  | IIIA | 12.75 |
| BT184 | 58 | F | Caucasian | -    |     |   | Post | + | + | NA | 1 | T2NXM0  | IIA  | 17.16 |
| BT185 | 43 | F | Caucasian | -    |     |   | Pre  | + | + | NA | 1 | T2NXM0  | IIA  | 11.13 |
| BT186 | 56 | F | Caucasian | -    |     |   | Post | + | + | NA | 1 | T3N0M0  | IIB  | 20.97 |
| BT187 | 67 | F | Caucasian | -    |     |   | Post | + | - | +  | 2 | T1cN0M0 | I    | 4.28  |
| BT188 | 54 | F | Caucasian | -    |     |   | Post | + | + | NA | 2 | T2N0M0  | IIA  | 2.12  |
| BT189 | 48 | F | Caucasian | -    |     |   | Pre  | + | + | NA | 1 | T2N1M0  | IIB  | 13.18 |
| BT190 | 51 | F | Caucasian | -    |     |   | Post | + | + | +  | 1 | T2N2M0  | IIIA | 17.59 |
| BT191 | 63 | F | Caucasian | Weak | Yes |   | Post | + | - | -  | 1 | T3N2M0  | IIIA | 0.00  |
| BT192 | 66 | F | Caucasian | -    |     |   | Post | + | - | -  | 2 | T4NXM0  | IIIB | 12.94 |
| BT193 | 52 | F | Caucasian | -    |     |   | Post | + | - | NA | 1 | T2N0M0  | IIA  | 59.92 |
| BT194 | 59 | F | Caucasian | Weak | Yes |   | Post | + | + | -  | 1 | T2N0M0  | IIA  | 20.56 |
| BT195 | 60 | F | Asian     | Weak | Yes |   | Post | + | + | NA | 1 | T3N1M0  | IIIA | 2.47  |
| BT196 | 49 | F | Caucasian | +    | Yes | + | Post | + | + | -  | 2 | T2N0M0  | IIA  | 7.98  |
| BT197 | 64 | F | Caucasian | -    |     |   | Post | + | + | -  | 2 | T1cN0M0 | I    |       |
| BT198 | 85 | F | Caucasian | -    |     |   | Post | + | + | -  | 1 | T2N2M0  | IIIA | 27.28 |
| BT199 | 53 | F | Caucasian | -    |     |   | Post | + | + | +  | 1 | T4N1M0  | IIIB | 0.96  |
| BT200 | 66 | F | Caucasian | -    |     |   | Post | + | + | -  | 1 | T1N0MX  | I    | 13.14 |

Note: MP stat, Menopausal status.

**Supplementary Table 3. Primer sequences for RT-PCR and genomic PCR.**

| <b>ESR1-CCDC170 RT PCR primers</b>      |                            |
|-----------------------------------------|----------------------------|
| <b>ESR1-CCDC170_F1</b>                  | CTGCGGTACCAAATATCAGCAC     |
| <b>ESR1-CCDC170_R1</b>                  | CTTCTCCAGTTGGTCTCTGGAT     |
| <b>ESR1-CCDC170_F2</b>                  | AACAGGCTCGAAAGGTCCATGC     |
| <b>ESR1-CCDC170_R2</b>                  | GCCTAGCATCTGCGACACCACC     |
| <b>P2RY6-ARHGEF17 RT PCR primers</b>    |                            |
| <b>P2RY6-ARHGEF17_F1</b>                | GCTCCACGAGTGGGAATTTG       |
| <b>P2RY6-ARHGEF17_R1</b>                | AGCGACTCCACATACGACTG       |
| <b>ESR1 RT PCR primers</b>              |                            |
| <b>ESR1_F1</b>                          | CGGGACTGCGGTACCAAATA       |
| <b>ESR1_R1</b>                          | CAGGGCAGAAGGCTCAGAAA       |
| <b>CCDC170 RT PCR primers</b>           |                            |
| <b>CCDC170_F1</b>                       | CGGAATGTGGCTCAAAATGCT      |
| <b>CCDC170_R1</b>                       | AGAAGTGGAAAGTGCTGCTGA      |
| <b>GAPDH RT PCR primers</b>             |                            |
| <b>GAPDH_F1</b>                         | CCCACTCCTCCACCTTTGAC       |
| <b>GAPDH_R1</b>                         | TCCTCTTGCTCTTGCTGG         |
| <b>ESR1-CCDC170 Genomic PCR primers</b> |                            |
| <b>ZR-75-1_F1</b>                       | GCTGGGACTGAAAGCAGAATT      |
| <b>ZR-75-1_R1</b>                       | AGAAGAGGCTAAAAATTAGGGGACA  |
| <b>MCF7_F1</b>                          | CATTTGGTTCCTCAGTCCCAGA     |
| <b>MCF7_R1</b>                          | ATGGCCGAAATTGGCTAACTA      |
| <b>HCC1428_F1</b>                       | AGTGGAAGGCTCAACTGCAT       |
| <b>HCC1428_R1</b>                       | AGAGCTGAGGCAAACACAGG       |
| <b>BT7_F1</b>                           | GTTGGCCTGACACATAATAGCA     |
| <b>BT7_R1</b>                           | AACCTACAGACAAGCTACTAAAGAC  |
| <b>BT36_F1</b>                          | ATTTTTCCCCATTCTGTAGGT      |
| <b>BT36_R1</b>                          | ACACCAGCTATATGCTTGATTTTCAG |
| <b>BT100_F1</b>                         | TGAGGCTCCCAGGATTATTG       |
| <b>BT100_R1</b>                         | ACTGGGTATCAGTGCCATTGT      |
| <b>BT113_F1</b>                         | TCTTACCCCGTCAATAATTTCTCCT  |
| <b>BT113_R1</b>                         | AGGTTGCCTCTGAAGAGAACTG     |
| <b>BT196_F1</b>                         | ATGGGAAGAAAAAGTGATGGTG     |
| <b>BT196_R1</b>                         | AGCAACCACTTATGGGTACAGG     |
